# Supplementary material
Source: PubMed Central journal article supplement (PMC4185244)
Supplement: NIHMS620447-supplement-1.pdf [file NIHMS620447-supplement-1.pdf]

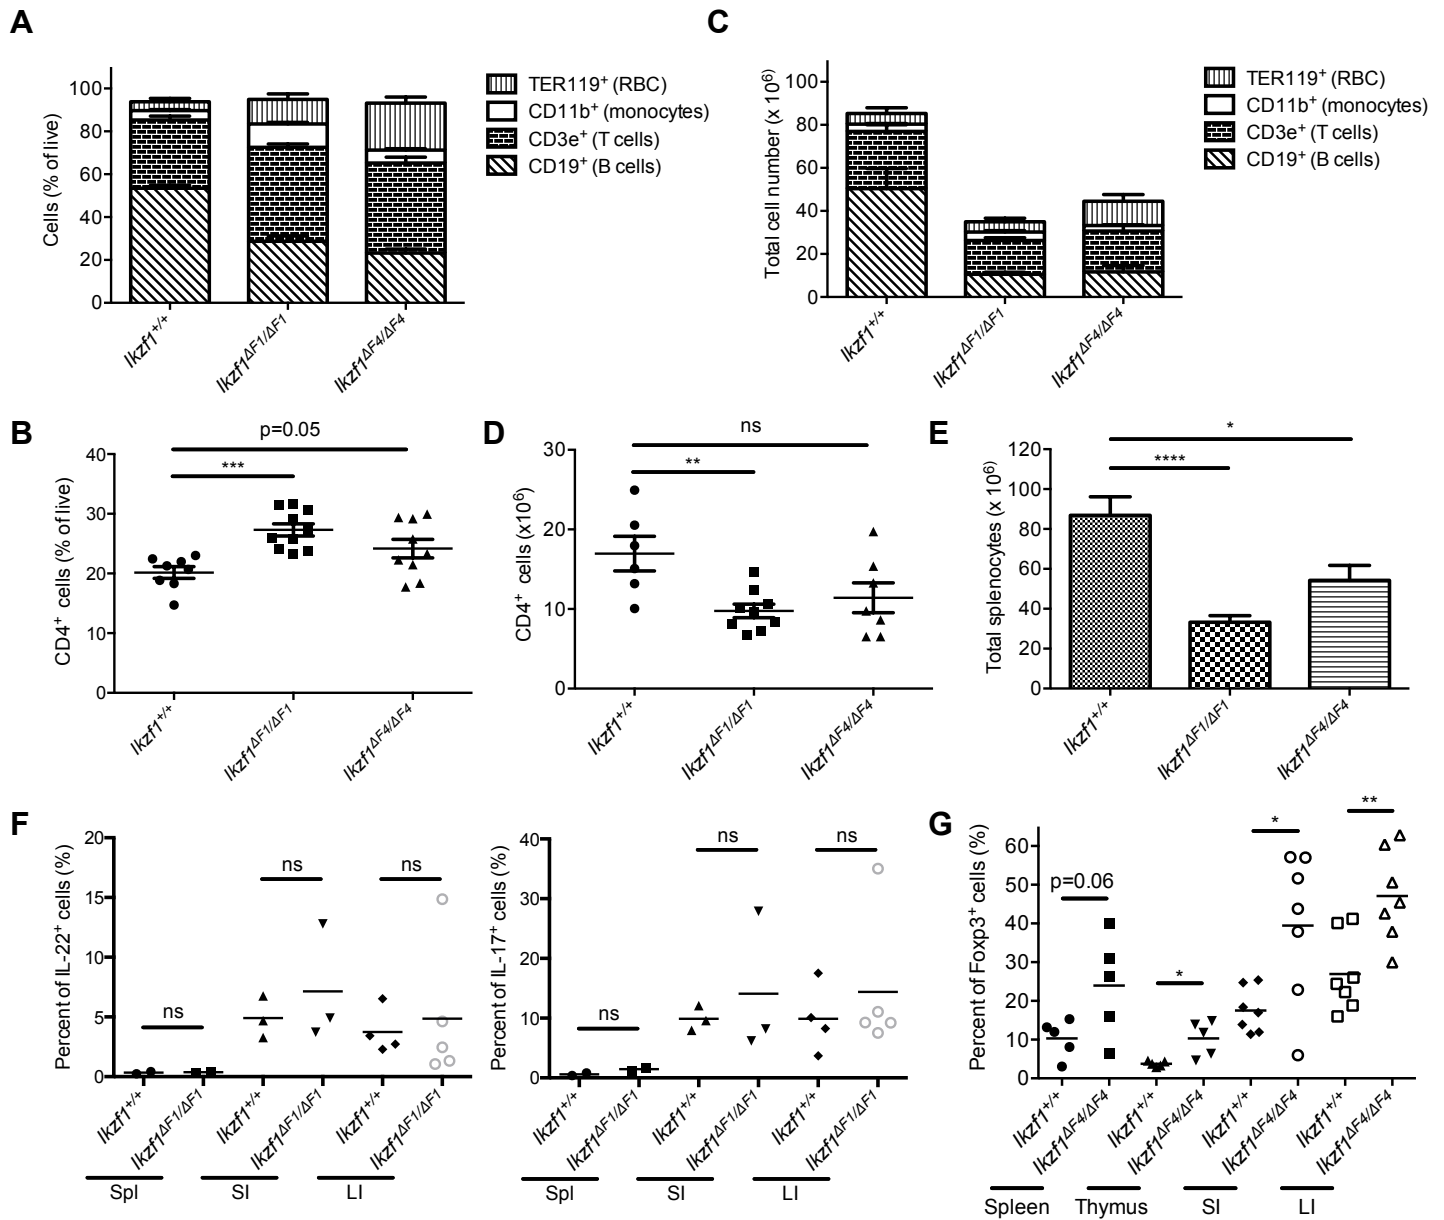

**Supplemental Figure 1: Phenotypic analysis of Ikaros mutant splenocytes and CD4<sup>+</sup> T cells**  
 Splenocytes were isolated from mice of the indicated genotypes, counted, stained ex vivo for surface markers, and measured by flow cytometry (A-E). CD4<sup>+</sup>TCRβ<sup>+</sup> cells were isolated from littermate mice of the indicated genotypes and stimulated ex vivo, and protein expression (F,G) was measured by intracellular staining and flow cytometry. Data are representative of at least four independent experiments. Data (A-G) are compiled from independent experiments and mean ± SEM are shown.

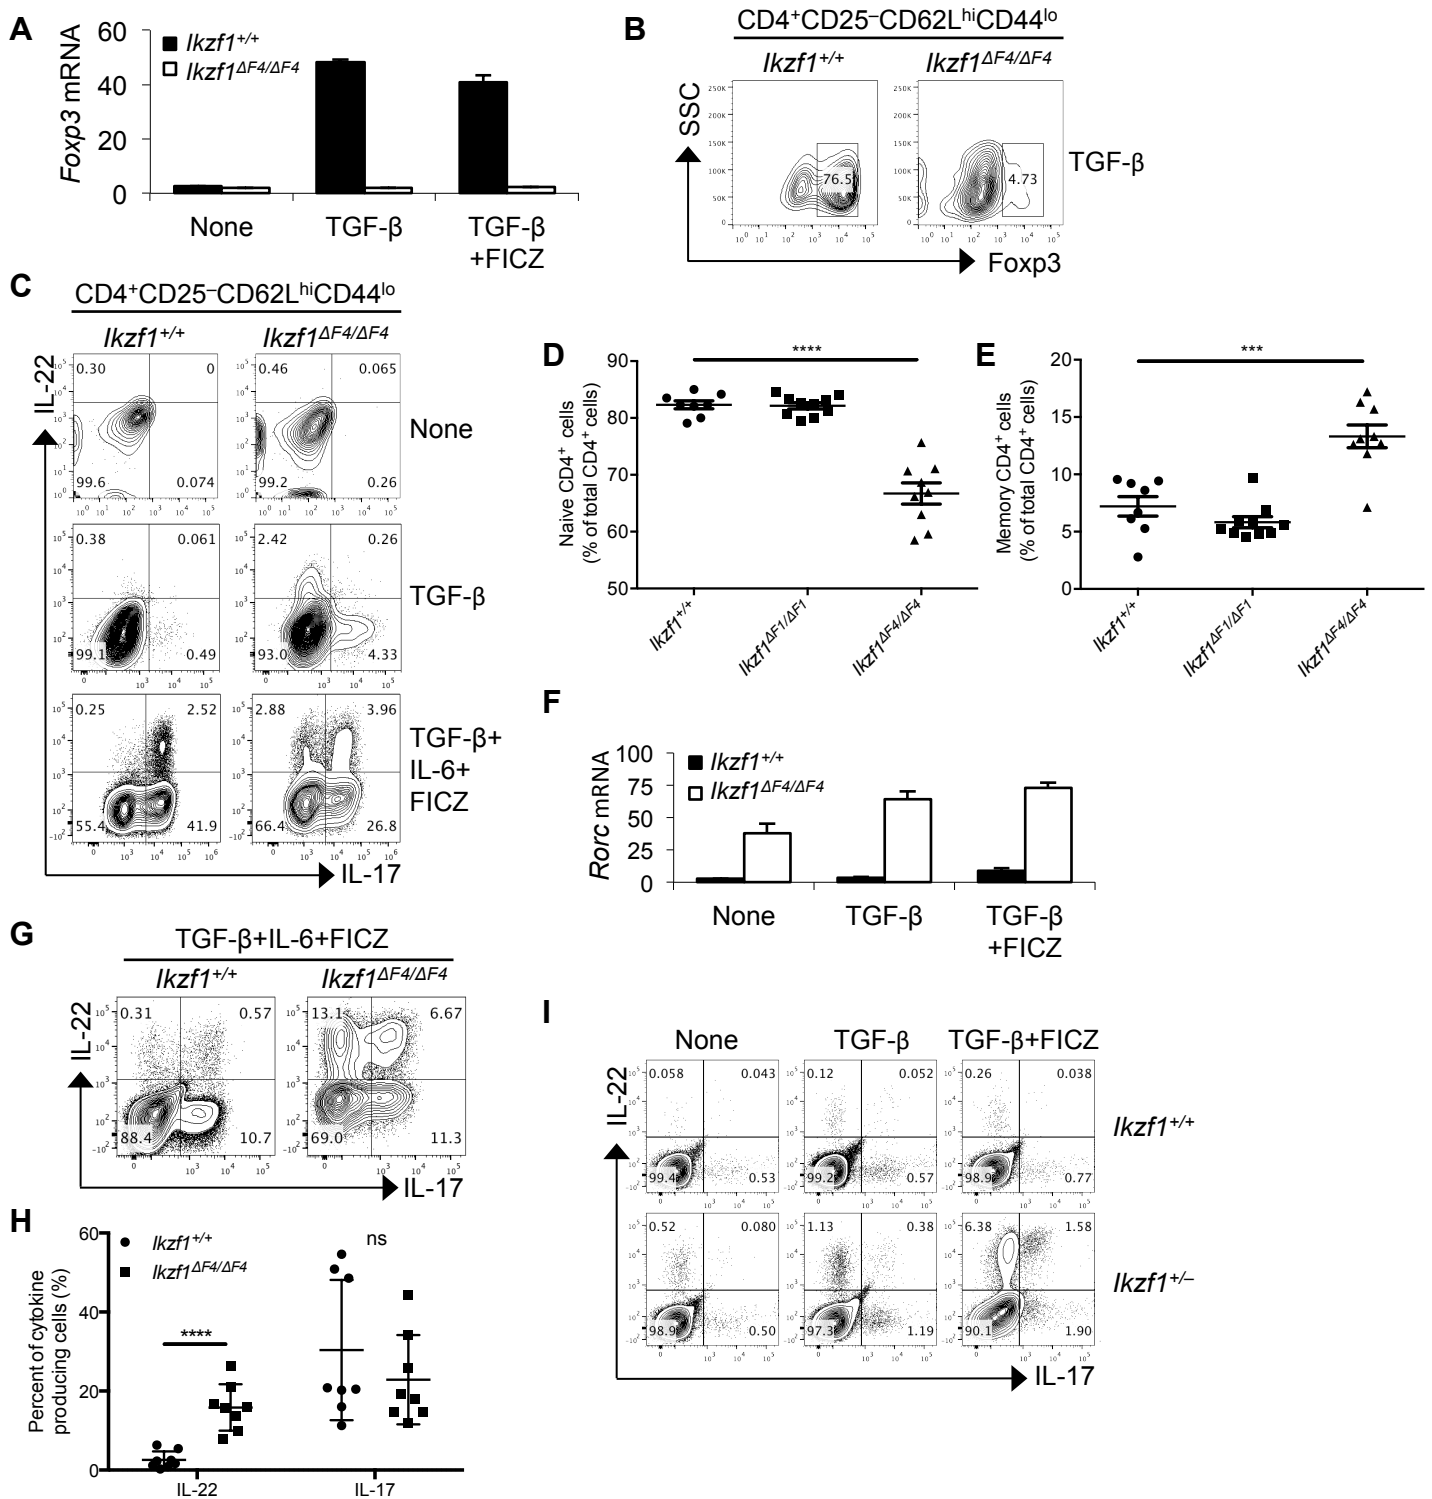

### Supplemental Figure 2: Aberrant phenotypes of *Ikzf1*<sup>ΔF4/ΔF4</sup> bulk and naïve CD4<sup>+</sup> T cells

Bulk (A,F-I) or naïve (B,C) CD4<sup>+</sup> T cells were purified from littermate mice of the indicated genotypes and activated by anti-CD3/CD28 under the indicated conditions for 96 hours in culture. mRNA expression (A,F) was measured after 48 hours by realtime RT-PCR and mean ± SD of experimental triplicates are shown. Splenocytes were isolated from mice of the indicated genotypes, stained and analyzed by flow cytometry for naïve (CD4<sup>+</sup>CD62L<sup>hi</sup>CD44<sup>lo</sup>) or memory (CD4<sup>+</sup>CD62L<sup>lo</sup>CD44<sup>hi</sup>) cells (D,E). Protein expression (B,C,G-I) was measured after 96 hours by intracellular staining and flow cytometry. Data are representative of at least four independent experiments. Data (D,E,H) are compiled from independent experiments and mean ± SEM are shown.

Th0

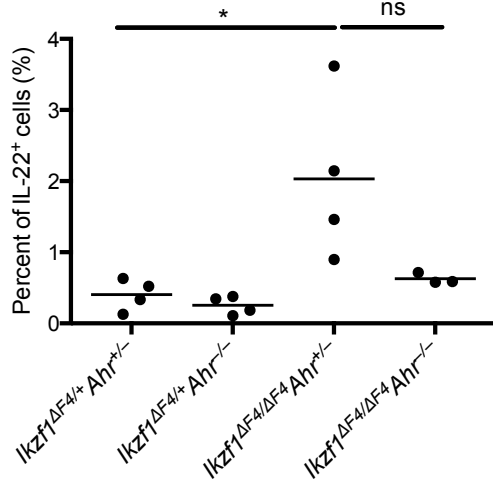

TGF-β

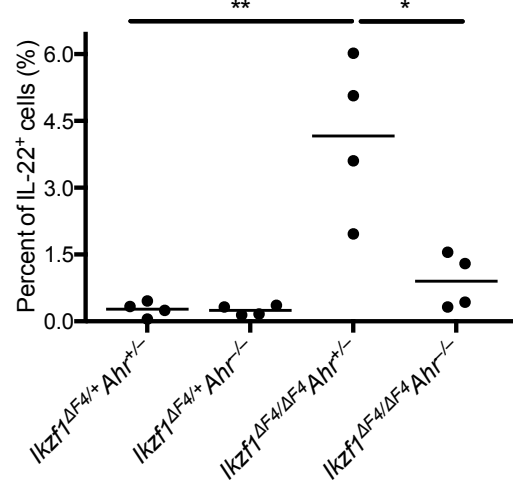

TGF-β+FICZ

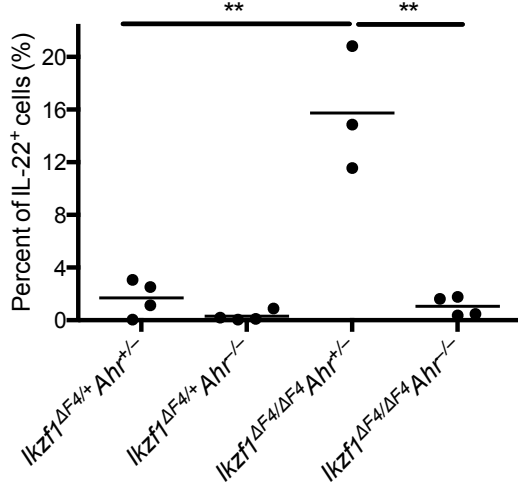

TGF-β+IL-6+FICZ

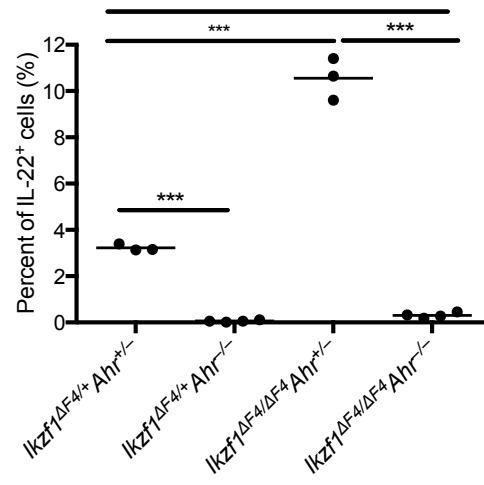

### Supplemental Figure 3: Ahr is required for aberrant IL-22 expression by *Ikzf1*<sup>ΔF4/ΔF4</sup> CD4<sup>+</sup> T cells

CD4<sup>+</sup> T cells were purified from littermate mice of the indicated genotypes and activated by anti-CD3/CD28 antibodies with or without TGF-β, IL-6, and/or Ahr ligand FICZ. Protein expression was measured after 96 hours in culture by intracellular staining and flow cytometry. Data are compiled from independent experiments and mean ± SEM are shown (each dot represents one mouse).

|                |                           |
|----------------|---------------------------|
| Actin FW       | CTTCTTTGCAGCTCCTTCGTT     |
| Actin RV       | AGGAGTCCTTCTGACCCATTC     |
| IL22 FW        | GACCAAACCTCAGCAATCAGCTC   |
| IL22 RV        | TACAGACGCAAGCATTCTCAG     |
| IL17 FW        | CTCCAGAAGGCCCTCAGACTAC    |
| IL17 RV        | AGCTTTCCCTCCGCATTGACACAG  |
| IL21 FW        | ATCCTGAACTTCTATCAGCTCCAC  |
| IL21 RV        | GCATTTAGCTATGTGCTTCTGTTTC |
| ROR gamma t FW | CCGCTGAGAGGGCTTCAC        |
| ROR gamma t RV | TGCAGGAGTAGGCCACATTACA    |
| Foxp3 FW       | CCCAGGAAAGACAGCAACCTT     |
| Foxp3 RV       | TTCTCACAAACCAGGCCACTTG    |
| Ahr FW         | GGCTTTCAGCAGTCTGATGTC     |
| Ahr RV         | CATGAAAGAAGCGTTCTCTGG     |
| Cyp1a1 FW      | TTTAAGAGCCTCACCCACGGTT    |
| Cyp1a1 RV      | ACCCAGCTACCCAACCTCACAA    |
| IL21-AcH3-F2   | CAAGAAGATGACTACCAGACAGACA |
| IL21-AcH3-R2   | GGGATGAATAAATAGGTAGCCGTAG |

**Supplemental Table 1:** Primers for realtime RT-PCR and ChIP assays
